# Supplementary material for: Isx9 Regulates Calbindin D28K Expression in Pancreatic β Cells and Promotes β Cell Survival and Function
Source: MDPI journal article supplement (doi:10.3390/ijms19092542), 2018-08-27
Supplement: s1 [file s1]

Supplemental Table 1 : Primers used in ChIP-assay

| Primer name               | Forward primer                           | Reverse primer              | Fragment Amplified |
|---------------------------|------------------------------------------|-----------------------------|--------------------|
| <b>rCalb-ChIP-p1</b>      | 5'-GAGCGGAGAAGAGATGGGTA-3'               | 5'-CTCCCTGCCTTGCTCTGAAT-3'  | -6777/-6536        |
| <b>rCalb-ChIP-p2</b>      | 5'-AATGAGCATGGTGACATGGA-3'               | 5'-TGCAGATGTTTCAGGGATGA-3'  | -5435/-5310        |
| <b>rCalb-ChIP-p3</b>      | 5'-TTCTCATTTTGGAGTCTTTTCTC-3'            | 5'-TTTGGTCGGTTGCTTTACAT-3'  | -2940/-2970        |
| <b>rCalb-ChIP-p4</b>      | 5'-CCTGAGACTGAACGGAGAGG-3'               | 5'-CACCCCTTTGACTTGCTTGT-3'  | -1396/-1240        |
| <b>rCalb-ChIP-p5</b>      | 5'-CCACCTGCTGCTTCCTAGAC-3'               | 5'-CCGCACCCAGTTCTCAGTAT-3'  | -3206/-93          |
| <b>rINS</b>               | 5'-CTGGGAAATGAGGTGGAAAA -3'              | 5'-CGTGGTGCAGCGGCTAGTTTG-3' | -140/+139          |
| <b>mCalbindin-ChIP-p7</b> | 5'-CACCCGGGTACCGTGCGGAGAAC TCCGGAGGAC-3' | 5'-CGTGGTGCAGCGGCTAGTTTG-3' | -36/+139           |

Supplemental Table 2: Primers pairs used for qPCR gene expression in rat mouse and human samples.

Rat qPCR primers

| Primer name | Forward Primer        | Reverse Primer        |
|-------------|-----------------------|-----------------------|
| D28K        | AGGAAAGGAGCTGCAGAACT  | CCCATCATCTCTCTGCCCCAT |
| NFATc1      | CCTAATTCCCTGGTGTCTGGA | GCTTCCCGTTGCAGACATAG  |
| NFATc2      | ATCACCGAGCCCACTATGAG  | GCTTGTTCTCCATGTAGCCG  |
| NFATc3      | GTGGCCATCCTGTTGTGAAG  | GCACCTGGTAAATGCGTGA   |
| NFATc4      | GAGGGGAGGAGCTAGTGTTG  | TGGTCAGAGTCAGTGTACC   |
| NFAT5       | TCCTACGGTGAAGCTGGAAG  | TGCCTTCGATGTCCACTTCT  |
| GRP78       | CCGAGGCGTATTTGGGAAAG  | ATAGTGCCAGCATCCTTGGT  |
| ChgA        | ACAACACAGCAGCTTTGAGG  | GTCCTTCTGTGGTTCCCTCA  |
| ChgB        | GAAATGGTGACTCGCTGCAT  | ACTCTTCTCAGGACTTGCC   |
| Ccnd1       | GCGTACCCTGACACCAATCT  | GGCTCCAGAGACAAGAAACG  |
| Ccnd2       | TTACCTGGACCGTTTCTTGG  | TGCTCAATGAAGTCGTGAGG  |
| Ccne1       | GACAGCTAGCGCGGTGTAG   | GTTGCTGTGGTCCCTTCGAGT |
| Cdk1        | CCGAAATCTGCCAGTTTGAT  | CTGGCCAGTTCATGGATTCT  |
| Cdk2        | CATTCCTCTTCCCCTCATCA  | GTACGGACAGGGACTCCAAA  |
| Cdkn1a/p21  | CTTGTCGCTGTCTTGCACTC  | AGGCAGAAGATGGGGAAGAG  |

Mouse qPCR primers

| Primer name | Forward Primer         | Reverse Primer           |
|-------------|------------------------|--------------------------|
| D28K        | TCTGGCTTCATTTTCGACGCTG | ACAAAGGATTTTCATTTCCGGTGA |
| NFATc1      | CCGTTGCTTCCAGAAAATAACA | TGTGGGATGTGAACTCGGAA     |
| NFATc2      | CCAATCAGTCGGGCTCCTAT   | GCTTGTTCTCCATGTAGCCG     |
| NFATc3      | GTGGCCATCCTGTTGTGAAG   | AGTAATCCGATGCACCTGGT     |
| NFATc4      | ATCCCCGAGTACAGCAACAA   | GATGAGTCTGGTAGGGGCTC     |
| NFAT5       | TGGGCGAAATACAACTCCCT   | CATCGGCATTCTCAGCTTC      |
| GRP78       | ACTTGGGGACCACCTATTCT   | ATCGCCAATCAGACGCTCC      |
| BDNF        | CACTTTTGAGCACGTGATCGA  | CGTTGGGCCGAACCTTCT       |

Human qPCR primers

| Primer name | Forward Primer       | Reverse Primer       |
|-------------|----------------------|----------------------|
| NFATc1      | GGACATCGGGAGGAAGAACA | ACAGGACCATCTTCTTCCCG |
| D28k        | TCATCCCTCATCACAGCCTC | AGTTCTGCAGCTCCTTTCCT |
